# Supplementary material for: Reclamation of Marine Chitinous Materials for the Production of α-Glucosidase Inhibitors via Microbial Conversion
Source: PubMed Central journal article supplement (PMC5706040; doi:10.3390/md15110350), 2017-11-07
Supplement: marinedrugs-15-00350-s001.pdf [file marinedrugs-15-00350-s001.pdf]

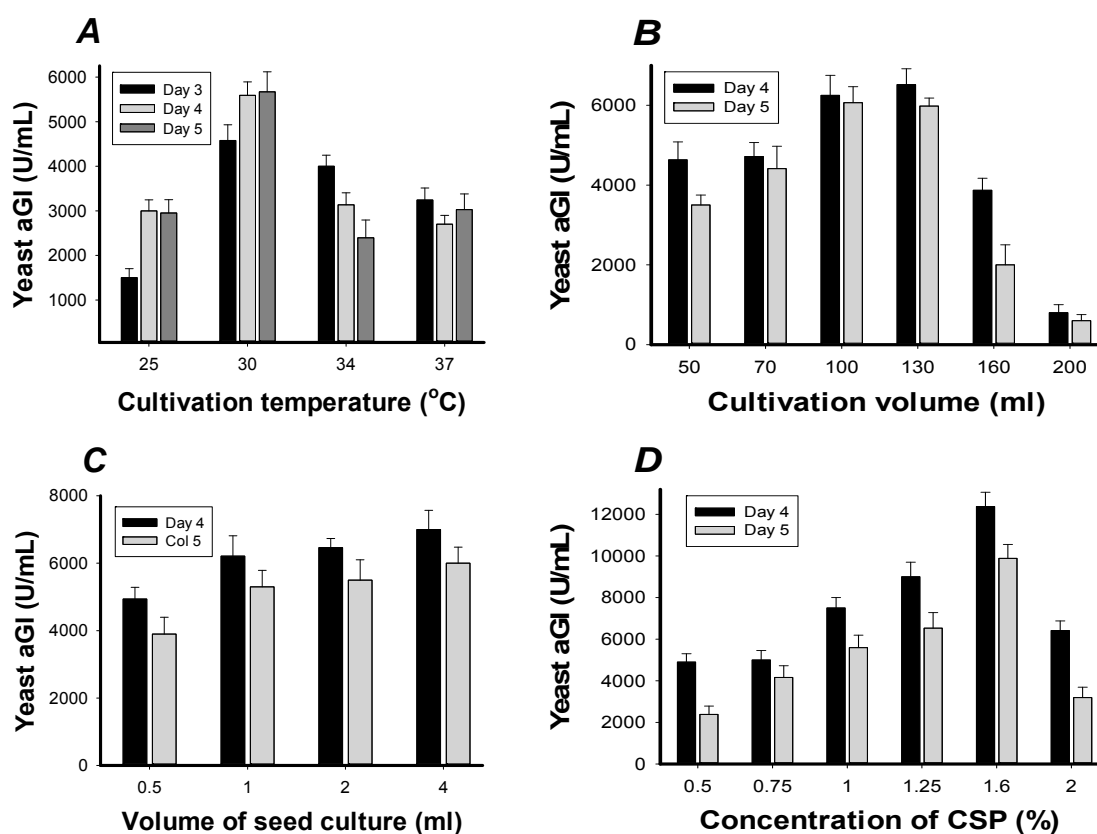

**Figure S1.** The effect of some parameters on aGIs synthesis. Cultivation temperature (A), medium culture volume (B), the inoculation amount of seed culture (C) and concentration of CSP (D). The experiment (A) was conducted at a temperature range of 25–37 °C, in 4–5 days (cultivation time), at 150 rpm (shaking speed), 100/250 mL (ratio volume of medium/flask), and bacterial seed solution of 1 mL (OD<sub>660nm</sub> = 0.25). The following experiments were designed based on the optimal conditions achieved from previous experiments. The *Saccharomyces cerevisiae*  $\alpha$ -glucosidase inhibition of the supernatants was tested and expressed as U/mL.
